# Supplementary material
Source: PubMed Central journal article supplement (PMC3749721)
Supplement: Supp_Fig1.pdf [file Supp_Fig1.pdf]

## Supplementary Data

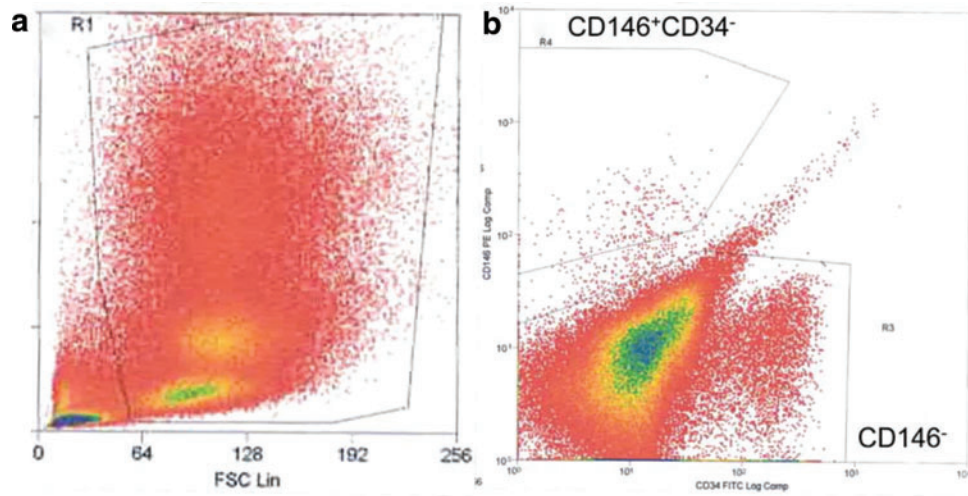

**SUPPLEMENTARY FIG. S1.** Cell sorting of isolated bone marrow mononucleated cells. **(a)** total cell population distribution by SSC (y-axis) and FSC (x-axis). **(b)** Selection of populations, which are CD146<sup>+</sup>CD34<sup>-</sup> and CD146<sup>-</sup>. These cells were sorted into separate vials.
