# Supplementary material
Source: PubMed Central journal article supplement (PMC3749721)
Supplement: Supp_Fig2.pdf [file Supp_Fig2.pdf]

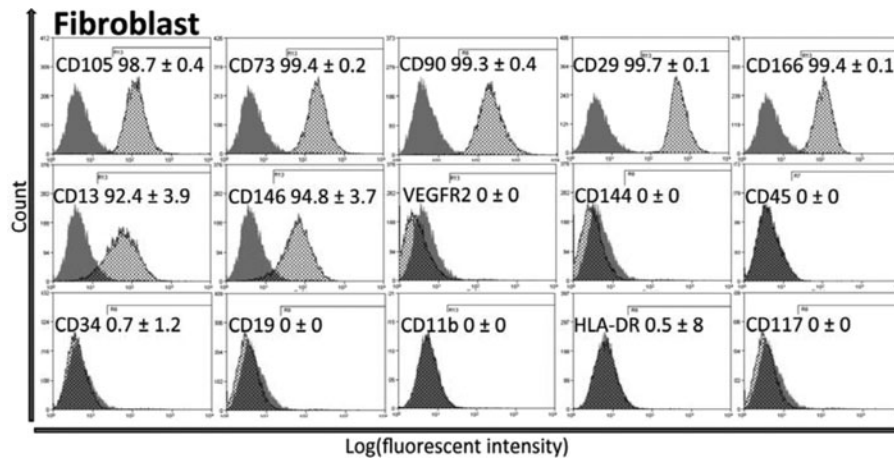

**SUPPLEMENTARY FIG. S2.** Fibroblasts share pericyte and bmMSC marker profile. IMR90s were analyzed for their expression of common MSC marker (CD105, CD73, CD90, CD29, CD166, and CD13), CD146 (used for pericyte isolation), endothelial marker (CD144 and VEGFR-2, CD34) and hematopoietic marker (CD34, CD45, CD19, CD11b, HLA-DR, CD117). bmMSC, bone marrow mesenchymal stromal cell; MSC, mesenchymal stromal cell.
