# Supplementary material
Source: PubMed Central journal article supplement (PMC3749721)
Supplement: Supp_Fig3.pdf [file Supp_Fig3.pdf]

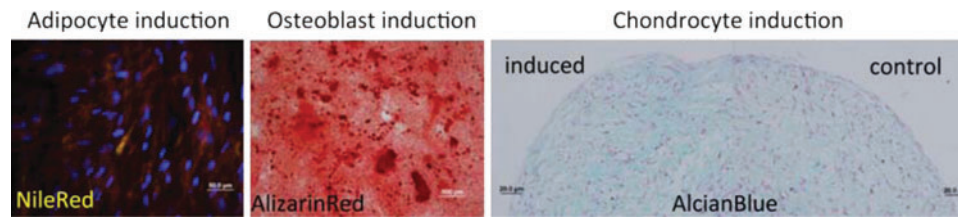

**SUPPLEMENTARY FIG. S3.** IMR90s do not have a tri-lineage potential. IMR90s were induced into adipocytes, osteoblasts and chondrocytes. Lipid droplets were stained with Nile red (*gold*), calcification with Alizarin red (*red*), and proteoglycans with Alcian blue (*blue*) in the respective induced cultures. IMR90s only show a positive staining for calcification in the osteogenic induced culture.
