# Supplementary material
Source: PubMed Central journal article supplement (PMC3749721)
Supplement: Supp_Fig4.pdf [file Supp_Fig4.pdf]

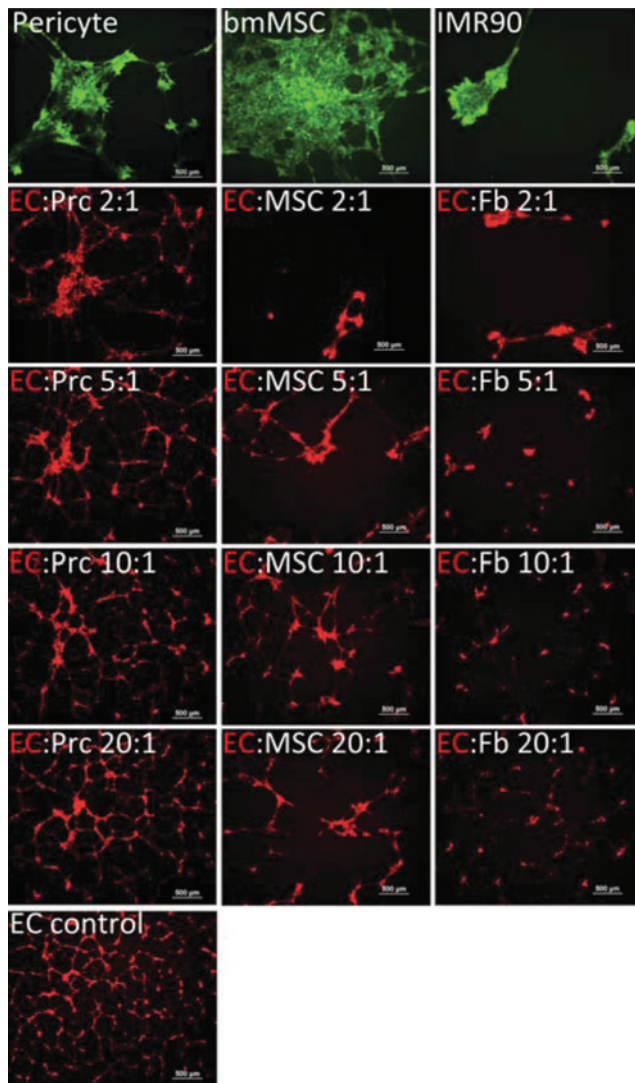

**SUPPLEMENTARY FIG. S4.** Pericytes preserve endothelial tubular network on matrigel. Twelve hours matrigel tube formation assay with HUVEC (EC, red label) and varying admixtures of either Pl-Prc (Prc, green), bmMSCs (MSC) or IMR90s labeled in green (only 1st row). With Pl-Prc (EC:Prc) fewer but larger diameter tubes are formed, while bmMSCs and IMR90s cause disintegration of the networks early on in a dose-dependent manner (EC:MSC and EC:Fb). Only EC are displayed. HUVEC, human umbilical vein endothelial cell; Pl-Prc, placenta-derived pericytes.
