# Supplementary material
Source: PubMed Central journal article supplement (PMC3749721)
Supplement: Supp_Fig5.pdf [file Supp_Fig5.pdf]

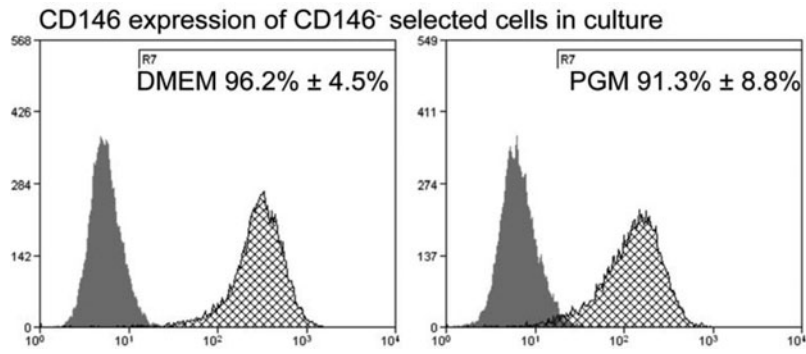

**SUPPLEMENTARY FIG. S5.** Flow cytometry analysis of CD146 expression by CD146<sup>-</sup> selected cells after culture in DMEM or PGM. CD146<sup>-</sup> selected cells start expressing CD146 in culture independent from culture media. Therefore, CD146 did not select the same cell population of cells after culture as compared to cells directly isolated from tissue. DMEM, Dulbecco's modified Eagle medium ; PGM, pericyte growth media.
