# Supplementary material
Source: PubMed Central journal article supplement (PMC3749721)
Supplement: Supp_Table1.pdf [file Supp_Table1.pdf]

SUPPLEMENTARY TABLE S1. ANTIBODIES USED FOR FLOW CYTOMETRY

| <i>Marker</i>                   |          | <i>Cat No.</i> | <i>Isotype</i>             | <i>Volume/50 <math>\mu</math>L</i> | <i>Source</i> |
|---------------------------------|----------|----------------|----------------------------|------------------------------------|---------------|
| Isotype control FITC            | G155-178 | 555573         | FITC Mouse IgG2a $\kappa$  | 10 $\mu$ L                         | BD Pharmigen  |
| Isotype control FITC            | MOPC-21  | 555748         | FITC Mouse IgG1 $\kappa$   | 10 $\mu$ L                         | BD Pharmigen  |
| Isotype control PE              | G155-178 | 555574         | PE Mouse IgG2a $\kappa$    | 10 $\mu$ L                         | BD Pharmigen  |
| Isotype control PE              | MOPC-21  | 555749         | PE Mouse IgG1 $\kappa$     | 10 $\mu$ L                         | BD Pharmigen  |
| CD90 (Thy-1)                    | 5E10     | 555595         | FITC Mouse IgG1 $\kappa$   | 2.5 $\mu$ L                        | BD Pharmigen  |
| CD105 (Endoglin)                | SN6      | 12-1057        | PE Mouse IgG1 $\kappa$     | 2.5 $\mu$ L                        | e-Bioscience  |
| CD29 (FN receptor) <sup>a</sup> | MAR4     | 555443         | PE Mouse IgG1 $\kappa$     | 10 $\mu$ L                         | BD Pharmigen  |
| CD146 (S-endo 1)                | P1H12    | 550315         | PE Mouse IgG1 $\kappa$     | 10 $\mu$ L                         | BD Pharmigen  |
| VEGFR-2 (Flk-1)                 | 89106    | 560494         | PE Mouse IgG1 $\kappa$     | 10 $\mu$ L                         | BD Pharmigen  |
| CD144(VE-cadherin)              | 55-7H1   | 560411         | FITC Mouse IgG1 $\kappa$   | 10 $\mu$ L                         | BD Pharmigen  |
| CD45                            | HI30     | 555482         | FITC Mouse IgG1 $\kappa$   | 10 $\mu$ L                         | BD Pharmigen  |
| CD13 (APN)                      | WM15     | 560998         | PE Mouse IgG1, $\kappa$    | 10 $\mu$ L                         | BD Pharmigen  |
| CD34                            | 581/CD34 | 555821         | FITC Mouse IgG1, $\kappa$  | 10 $\mu$ L                         | BD Pharmigen  |
| CD73 (5'-NT)                    | AD2      | 550257         | PE Mouse IgG1, $\kappa$    | 10 $\mu$ L                         | BD Pharmigen  |
| CD166 (ALCAM)                   | 3A6      | 559263         | PE Mouse IgG1, $\kappa$    | 10 $\mu$ L                         | BD Pharmigen  |
| CD11b                           | D12      | 347557         | PE Mouse IgG2a, $\kappa$   | 10 $\mu$ L                         | BD Bioscience |
| CD19                            | HIB19    | 555412         | FITC Mouse IgG1, $\kappa$  | 10 $\mu$ L                         | BD Pharmigen  |
| HLA-DR                          | G46-6    | 556643         | FITC Mouse IgG2a, $\kappa$ | 10 $\mu$ L                         | BD Pharmigen  |
| CD117 (c-kit)                   | 104D2    | 340529         | PE Mouse IgG1 $\kappa$     | 10 $\mu$ L                         | BD Bioscience |

Pericytes, bmMSC, and IMR90s were grown to confluency in separate T75 flasks trypsinized and resuspended in flow cytometry buffer (PBS with 1% FBS). Antibodies were added to 100,000–200,000 cells in 50  $\mu$ L. Samples were incubated for 1 h at 4°C washed once with flow cytometry buffer and fixed with 1% formaldehyde.
