# Supplementary material
Source: PubMed Central journal article supplement (PMC3749721)
Supplement: Supp_Table2.pdf [file Supp_Table2.pdf]

SUPPLEMENTARY TABLE S2. ANTIBODIES USED FOR IMMUNOCYTOCHEMISTRY

| <i>Marker</i>        | <i>Clone</i> | <i>Cat No.</i> | <i>Format</i>     | <i>Dilution</i> | <i>Source</i>   |
|----------------------|--------------|----------------|-------------------|-----------------|-----------------|
| Primary antibodies   |              |                |                   |                 |                 |
| PDGFR- $\beta$       | Y92          | AB32570        | Rabbit monoclonal | 1:100           | Abcam           |
| NG2                  |              | AB5320         | Rabbit polyclonal | 1:100           | Millipore       |
| $\alpha$ -SMA        | 1A4          | M0851          | Mouse monoclonal  | 1:100           | Dako Cytomation |
| Desmin               | DE-U-10      | AB6322         | Mouse monoclonal  | 1:100           | Abcam           |
| TIE-2                | C-20         | SC-324         | Rabbit polyclonal | 1:25            | Santa Cruz      |
| Secondary antibodies |              |                |                   |                 |                 |
| 488 goat anti mouse  |              | S34253         | Polyclonal        | 1:400           | Invitrogen      |
| 594 goat anti rabbit |              | A11072         | Polyclonal        | 1:400           | Invitrogen      |

Pericytes and bmMSCs were seeded into 24-well plates, grown to confluency and fixed with 100% Methanol for 10 min at  $-20^{\circ}\text{C}$ . Samples were blocked using 3% BSA in PBS (w/V) and incubated with primary antibody at given dilution for 1.5 h. Wells were washed with PBS thrice for 5 min each and incubated for 30 min with secondary antibodies in the dark.

bmMSCs, bone marrow mesenchymal stromal cells.
